# Supplementary material
Source: HighWire-hosted journal article supplement (https://lupus.bmj.com/content/8/1/e000458)
Supplement: inline-supplementary-material-2 [file inline-supplementary-material-2.pdf]

Supplementary Table 1. Baseline characteristics of biopsy-confirmed LN patients based on the 2019 EULAR/ACR criteria (n=126)

| Characteristics                                | SLE (n=120)      | non-SLE ( n=6)   | Nominal P value   |
|------------------------------------------------|------------------|------------------|-------------------|
| Age, mean $\pm$ SD                             | 35.5 $\pm$ 13.0  | 34 $\pm$ 15.8    |                   |
| Sex, male/female                               | 20/100           | 1/5              |                   |
| Disease duration, months                       | 1.0 (0.5, 4.0)   | 1.0 (0.5, 120.0) | 0.578             |
| SLEDAI                                         | 18.48 $\pm$ 5.43 | 18.0 $\pm$ 2.76  |                   |
| ANA titer                                      |                  |                  |                   |
| < 1:40                                         | 0                | 1                |                   |
| 1:40                                           | 0                | 5                | <b>&lt;0.0001</b> |
| $\geq$ 1:80                                    | 120              | 0                |                   |
| Clinical manifestation                         |                  |                  |                   |
| Renal domain                                   | Positive (%)     | Positive (%)     |                   |
| Protein >0.5 g/24 hours                        | 121 (100%)       | 6(100%)          | 1.000             |
| Class II or V lupus nephritis                  | 33               | 1                |                   |
| Class III or IV lupus nephritis                | 87 (72.73%)      | 5(83.33%)        |                   |
| Constitutional                                 |                  |                  |                   |
| Fever                                          | 27 (22.31%)      | 2(33.33%)        | 0.619             |
| Mucocutaneous                                  |                  |                  |                   |
| Acute cutaneous lupus                          | 36 (29.75%)      | 2(33.33%)        | 1.000             |
| Subacute cutaneous lupus or discoid rash       | 3 (2.48%)        | 1(16.67%)        | 0.178             |
| Non-scarring alopecia                          | 16 (13.22%)      | 1(16.67%)        | 0.586             |
| Oral ulcer                                     | 8 (6.61%)        | 1(16.67%)        | 0.363             |
| Musculoskeletal domain                         |                  |                  |                   |
| joint involvement                              | 5 (4.13%)        | 0                | 1.000             |
| Serosal domain                                 |                  |                  |                   |
| Pleural or pericardial effusion                | 35 (28.93%)      | 1(16.67%)        | 0.674             |
| Acute pericarditis                             | 0                | 0                | 1.000             |
| Neuropsychiatric domain                        |                  |                  |                   |
| Delirium                                       | 0                | 0                | 1.000             |
| Psychosis                                      | 0                | 0                | 1.000             |
| Seizure                                        | 3 (2.48%)        | 0                | 1.000             |
| Haematologic domain                            |                  |                  |                   |
| Leucopenia                                     | 66 (55.37%)      | 2(33.33%)        |                   |
| Thrombocytopenia                               | 32 (27.27%)      | 2(33.33%)        |                   |
| Autoimmune haemolysis                          | 8 (6.61%)        | 1(16.67%)        | 0.363             |
| Laboratory criteria                            |                  |                  |                   |
| Immunologic domain                             |                  |                  |                   |
| Anti- $\beta$ 2GP1 antibodies (IgG and/or IgM) | 32 (26.45%)      | 0                | 0.336             |

|                                             |              |            |              |
|---------------------------------------------|--------------|------------|--------------|
| Anticardiolipin antibodies (IgG and/or IgM) | 32 (26.45%)  | 0          | 0.336        |
| Lupus anticoagulant*                        | 0            | 0          |              |
| Complement domain                           |              |            |              |
| C3                                          | 105 (87.60%) | 6(100%)    | 1.000        |
| C4                                          | 94 (78.51%)  | 5(83.33%)  | 1.000        |
| Highly specific antibodies domain           | 89           | 2          | <b>0.019</b> |
| Anti-dsDNA antibody                         | 68 (56.20%)  | 1(16.67%)  | 0.090        |
| Anti-Sm antibody                            | 41 (34.71%)  | 1(16.67%)  | 0.663        |
| ACR/EULAR criteria score                    | 25.05 ± 0.60 | 21 ± 5.44  | 0.098        |
| Treatment response                          |              |            |              |
| renal CR                                    | 77 (64.17%)  | 5 (83.33%) |              |
| renal PR                                    | 33 (27.50%)  | 1 (16.67%) | 0.585        |
| no remission                                | 10 (8.33%)   | 0          |              |
| Long-term outcome                           |              |            |              |
| flare                                       | 14 (11.67%)  | 0          | 1.0          |
| ERSD                                        | 2 (1.67%)    | 0          | 1.0          |
| death                                       | 3 (2.5%)     | 0          | 1.0          |

\*The data of lupus anticoagulant was absent.

EULAR: European League Against Rheumatism; ACR: American College of Rheumatology; Anti-dsDNA, antibodies to double-stranded DNA; Anti-Sm, anti-Smith; LN, lupus nephritis; C3/4, complement 3/4.
